# Supplementary material for: Sodium Imbalance in Mice Results Primarily in Compensatory Gene Regulatory Responses in Kidney and Colon, but Not in Taste Tissue
Source: Nutrients. 2020 Apr 3;12(4):995. doi: 10.3390/nu12040995 (PMC7230584; doi:10.3390/nu12040995)
Supplement: Supplementary file 1 [file nutrients-12-00995-s001.pdf]

## Supplementary

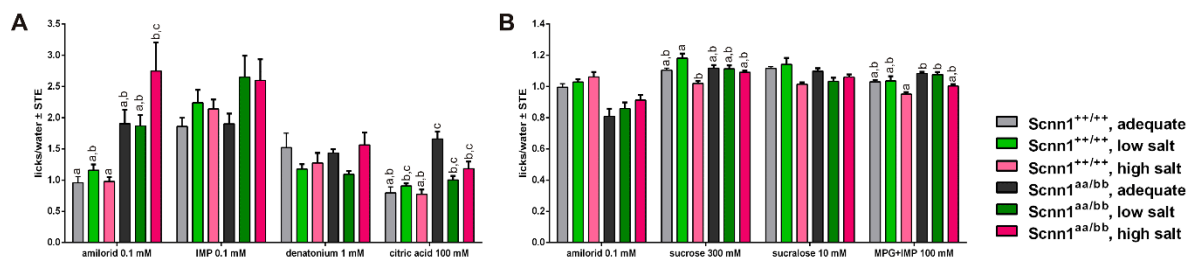

**Figure S1.** Taste responses of Scnn1<sup>+/++</sup> and Scnn1<sup>aa/bb</sup> mice to control stimuli after dietary intervention. After 4 weeks fed with sodium-adequate, low, or high salt diet, Scnn1<sup>+/++</sup> and Scnn1<sup>aa/bb</sup> mice were subjected to short-term preference tests using an automated gustometer. To do so, animals were either restricted for 22.5 h with access to 2.0 mL water and 1 g food (attractive restriction conditions, **(A)**) or water-deprived for 22.5 h (aversive restriction conditions, **(B)**). Taste solutions and concentrations were presented in random order. Each data point represents a mean  $\pm$  STE of 5 s presentations from 10 to 11 animals tested. Statistical testing was based on UNIANOVA and post-hoc analysis using Bonferroni's multiple comparison test. Statistical differences were indicated by different letters between individual groups.

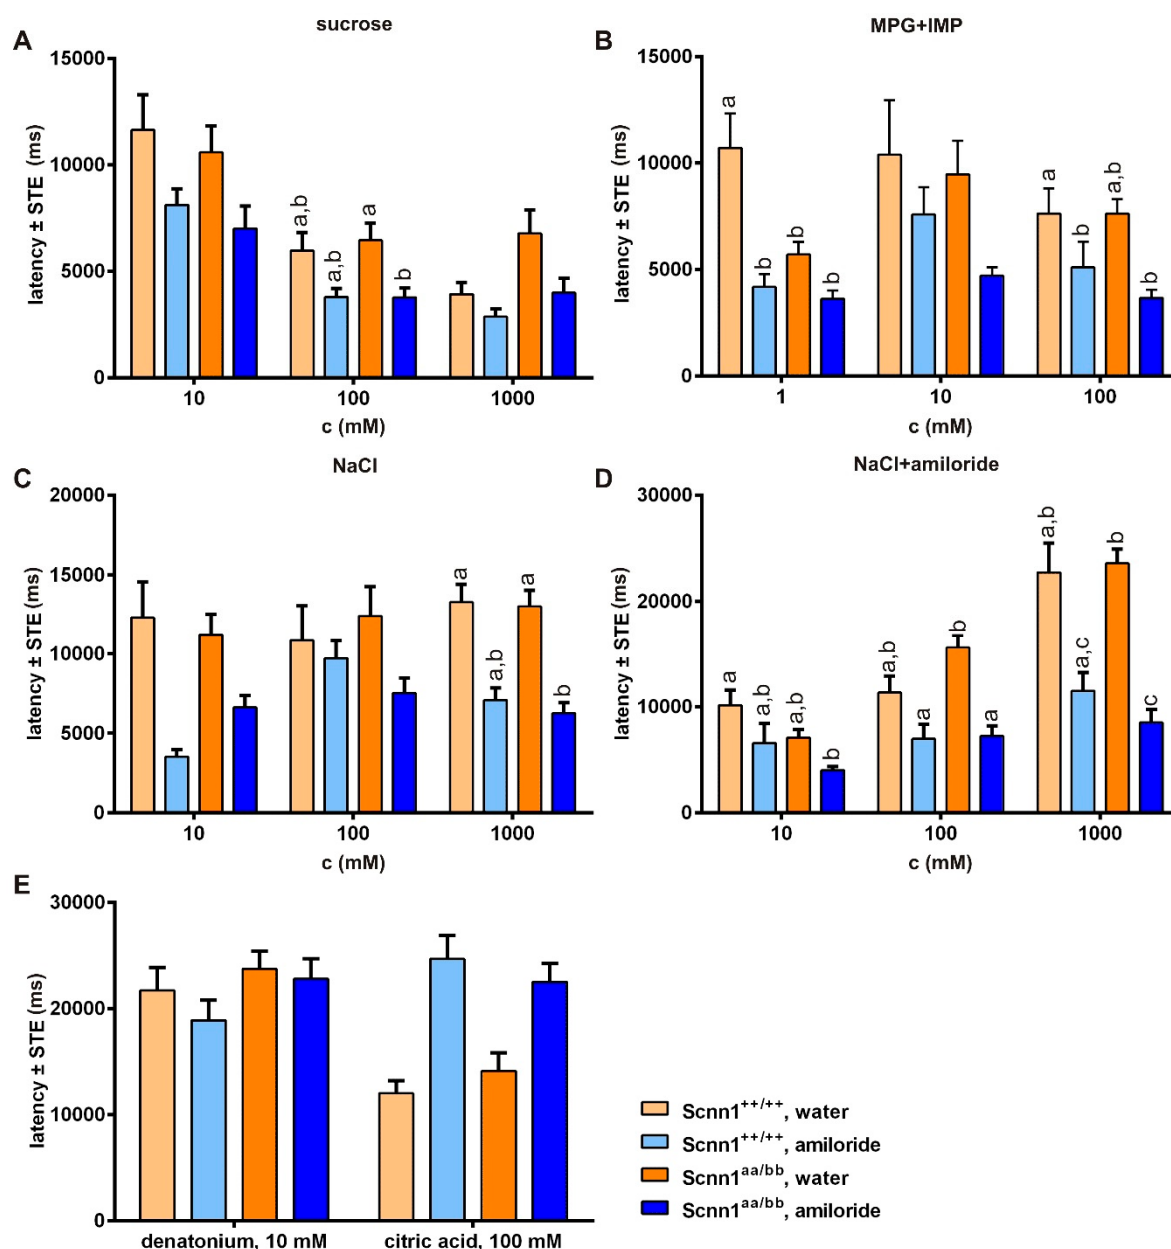

**Figure S2.** Latency to initiate the first lick for different taste stimuli after access to amiloride-containing water. Scnn1<sup>+/+</sup> and Scnn1<sup>aa/bb</sup> mice receiving sodium-adequate diet had either access to 300  $\mu$ M amiloride-containing water 13 h prior to restriction starting or received water without amiloride. The restriction phase lasted for 22.5 h with access to 2.0 mL water  $\pm$  300  $\mu$ M amiloride and 1 g food. Mean latency to the first lick for each stimulus concentration was determined by an automated gustometer presenting different concentrated solutions of sucrose (A), monopotassium glutamate with inosine 5' monophosphate (MPG+IMP; B), sodium chloride (NaCl; C), NaCl with amiloride (NaCl+amiloride; D), or bitter and sour stimuli (E). Each bar represents the mean  $\pm$  STE from 10 to 16 animals tested. Statistical testing was based on UNIANOVA and post-hoc analysis using Bonferroni's multiple comparison test. Different letters indicate statistical significance.

**Table S1.** Relative expression of ENaC subunits in Scnn1<sup>+/+</sup> and Scnn1<sup>aa/bb</sup> mice. Data represent the relative expression of ENaC subunits normalized to  $\beta$ -actin and eEf2 in isolated taste buds and non-gustatory tissue of Scnn1<sup>+/+</sup> ( $n = 4$ ) and Scnn1<sup>aa/bb</sup> ( $n = 6$ ) mice fed with a sodium-adequate diet. Mean variances between Scnn1<sup>+/+</sup> and Scnn1<sup>aa/bb</sup> animals are indicated in %. Statistical testing was based on Student's  $t$ -test. Differences were considered to be significant if  $p < 0.05$ , as indicated in bold.

|                          | ENaC subunit | Scnn1 <sup>+/+</sup> [33]<br>(mean $\pm$ STABW) | Scnn1 <sup>aa/bb</sup><br>(mean $\pm$ STABW) | Scnn1 <sup>aa/bb</sup> /<br>Scnn1 <sup>+/+</sup> (%) | $p$ -Value   |
|--------------------------|--------------|-------------------------------------------------|----------------------------------------------|------------------------------------------------------|--------------|
| fuP                      | $\alpha$     | 0.0102 $\pm$ 0.0015                             | 0.0151 $\pm$ 0.0053                          | 148                                                  | 0.071        |
|                          | $\beta$      | 0.0025 $\pm$ 0.0009                             | 0.0062 $\pm$ 0.0030                          | 247                                                  | <b>0.049</b> |
|                          | $\gamma$     | 0.0044 $\pm$ 0.0018                             | 0.0093 $\pm$ 0.0026                          | 212                                                  | <b>0.011</b> |
| CV+foP                   | $\alpha$     | 0.0390 $\pm$ 0.0054                             | 0.0606 $\pm$ 0.0111                          | 155                                                  | <b>0.007</b> |
|                          | $\beta$      | 0.0015 $\pm$ 0.0002                             | 0.0027 $\pm$ 0.0007                          | 174                                                  | <b>0.011</b> |
|                          | $\gamma$     | 0.0012 $\pm$ 0.0002                             | 0.0020 $\pm$ 0.0005                          | 166                                                  | <b>0.015</b> |
| non-gustatory epithelium | $\alpha$     | 0.0208 $\pm$ 0.0032                             | 0.0228 $\pm$ 0.0061                          | 110                                                  | 0.567        |
|                          | $\beta$      | 0.0007 $\pm$ 0.0002                             | 0.0011 $\pm$ 0.0004                          | 147                                                  | 0.150        |
|                          | $\gamma$     | 0.0008 $\pm$ 0.0001                             | 0.0008 $\pm$ 0.0001                          | 95.0                                                 | 0.623        |
| kidney                   | $\alpha$     | 0.0341 $\pm$ 0.0005                             | 0.0698 $\pm$ 0.0235                          | 204                                                  | <b>0.018</b> |
|                          | $\beta$      | 0.0157 $\pm$ 0.0026                             | 0.0260 $\pm$ 0.0086                          | 166                                                  | 0.052        |
|                          | $\gamma$     | 0.0278 $\pm$ 0.0145                             | 0.0425 $\pm$ 0.0112                          | 153                                                  | 0.107        |
| distal colon             | $\alpha$     | 0.0268 $\pm$ 0.0085                             | 0.0357 $\pm$ 0.0104                          | 133                                                  | 0.195        |
|                          | $\beta$      | 0.0026 $\pm$ 0.0013                             | 0.0051 $\pm$ 0.0017                          | 193                                                  | <b>0.045</b> |
|                          | $\gamma$     | 0.0052 $\pm$ 0.0054                             | 0.0091 $\pm$ 0.0068                          | 173                                                  | 0.374        |

**Table S2.** Statistical significance of different factors on the short-term preference tests of Scnn1<sup>+/+</sup> and Scnn1<sup>aa/bb</sup> animals after dietary intervention. After 4 weeks fed with sodium-adequate, low, or high salt diet, 10 to 11 Scnn1<sup>+/+</sup> and Scnn1<sup>aa/bb</sup> mice were subjected to short-term preference tests using an automated gustometer. To do so, animals were either restricted for 22.5 h with access to 2.0 mL water and 1 g food (attractive restriction conditions) or water-deprived for 22.5 h (aversive restriction conditions). Statistical significance (*p*-value) of lick responses to different concentrations of taste solutions based on diet (sodium-adequate, low, or high), genotype (Scnn1<sup>+/+</sup> versus Scnn1<sup>aa/bb</sup>), and diet X genotype interactions are shown. Statistical testing was based on UNIANOVA and post-hoc analysis using Bonferroni's multiple comparison test. Differences were considered to be statistically significant if *p* < 0.05, as indicated in bold.

| Protocol   | Substance      | Concentration | Diet         | Genotype         | Diet X genotype  |
|------------|----------------|---------------|--------------|------------------|------------------|
| attractive | sucrose        | 10            | 0.736        | 0.761            | 0.609            |
|            |                | 30            | <b>0.022</b> | <b>0.021</b>     | <b>&lt;0.001</b> |
|            |                | 100           | 0.182        | 0.412            | 0.376            |
|            |                | 300           | 0.461        | 0.784            | 0.842            |
|            |                | 1000          | 0.479        | 0.176            | 0.151            |
|            | MPG+IMP        | 1             | 0.282        | <b>&lt;0.001</b> | <b>&lt;0.001</b> |
|            |                | 3             | <b>0.013</b> | <b>0.032</b>     | <b>0.002</b>     |
|            |                | 10            | 0.957        | <b>&lt;0.001</b> | <b>&lt;0.001</b> |
|            |                | 30            | 0.914        | 0.824            | 0.962            |
|            |                | 100           | 0.166        | 0.985            | 0.545            |
|            | NaCl           | 10            | 0.140        | 0.214            | 0.089            |
|            |                | 30            | <b>0.009</b> | 0.122            | <b>0.014</b>     |
|            |                | 100           | 0.739        | <b>&lt;0.001</b> | <b>0.029</b>     |
|            |                | 300           | 0.303        | <b>0.034</b>     | <b>0.042</b>     |
|            |                | 1000          | 0.359        | <b>0.004</b>     | <b>0.049</b>     |
|            | NaCl+amiloride | 10            | 0.250        | 0.058            | 0.125            |
|            |                | 30            | 0.599        | 0.127            | 0.431            |
|            |                | 100           | 0.352        | 0.204            | 0.297            |
|            |                | 300           | 0.430        | 0.078            | 0.205            |
|            |                | 1000          | 0.596        | 0.490            | 0.548            |
|            | amiloride      | 0.1           | 0.414        | <b>0.001</b>     | <b>0.012</b>     |
|            | IMP            | 0.1           | 0.380        | 0.457            | 0.724            |
|            | denatonium     | 1             | 0.293        | 0.663            | 0.764            |
|            | citric acid    | 100           | 0.113        | <b>0.006</b>     | <b>0.009</b>     |
| aversive   | denatonium     | 0.1           | 0.460        | <b>0.002</b>     | <b>0.006</b>     |
|            |                | 0.3           | 0.545        | <b>0.001</b>     | <b>0.035</b>     |
|            |                | 1             | 0.308        | <b>0.030</b>     | <b>0.038</b>     |
|            |                | 3             | 0.893        | 0.256            | 0.662            |
|            |                | 10            | 0.914        | 0.240            | 0.884            |
|            |                | 1             | 0.124        | <b>&lt;0.001</b> | <b>0.003</b>     |

| Protocol | Substance      | Concentration | Diet             | Genotype         | Diet X genotype  |
|----------|----------------|---------------|------------------|------------------|------------------|
|          | citric acid    | 3             | 0.380            | 0.963            | 0.364            |
|          |                | 10            | 0.362            | <b>&lt;0.001</b> | <b>&lt;0.001</b> |
|          |                | 30            | 0.209            | <b>0.045</b>     | 0.105            |
|          |                | 100           | <b>0.005</b>     | <b>0.022</b>     | <b>0.003</b>     |
|          | NaCl           | 10            | 0.171            | 0.081            | 0.090            |
|          |                | 30            | 0.861            | 0.632            | 0.759            |
|          |                | 100           | 0.183            | 0.505            | 0.525            |
|          |                | 300           | <b>0.002</b>     | 0.050            | <b>&lt;0.001</b> |
|          |                | 1000          | <b>&lt;0.001</b> | <b>&lt;0.001</b> | <b>&lt;0.001</b> |
|          | NaCl+amiloride | 10            | 0.068            | 0.754            | <b>0.035</b>     |
|          |                | 30            | <b>0.002</b>     | 0.144            | <b>&lt;0.001</b> |
|          |                | 100           | 0.067            | 0.307            | 0.284            |
|          |                | 300           | <b>0.002</b>     | 0.354            | <b>0.007</b>     |
|          |                | 1000          | <b>0.001</b>     | <b>0.001</b>     | <b>&lt;0.001</b> |
|          | amiloride      | 0.1           | 0.389            | <b>0.002</b>     | <b>0.028</b>     |
|          | sucrose        | 300           | <b>0.009</b>     | 0.815            | <b>0.007</b>     |
|          | sucralose      | 10            | 0.080            | 0.166            | <b>0.025</b>     |
|          | MPG+IMP        | 100           | <b>0.001</b>     | <b>0.004</b>     | <b>&lt;0.001</b> |

**Table S3.** Statistical significance of different factors on the short-term preference tests of Scnn1<sup>+/+/+</sup> and Scnn1<sup>aa/bb</sup> animals. After 4 weeks fed with sodium-adequate, low, or high salt diet, 10 to 11 Scnn1<sup>+/+/+</sup> and Scnn1<sup>aa/bb</sup> mice were subjected to short-term preference tests using an automated gustometer. To do so, animals were either restricted for 22.5 h with access to 2.0 mL water and 1 g food (attractive restriction conditions) or water-deprived for 22.5 h (aversive restriction conditions). Data represent the statistical significance (*p*-value) of diet, genotype, concentration, and a different combination of them, based on all tested concentrations of one substance (first 4 listed substances for each protocol were tested for 5 concentrations, whereas the remaining were only checked for 1 concentration). *p*-Values were based on UNIANOVA and post-hoc analysis using Bonferroni's multiple comparison test. Differences were considered to be statistically significant if *p* < 0.05, as indicated in bold.

| Protocol   | Substance      | Factor                          | <i>p</i> -Value  |
|------------|----------------|---------------------------------|------------------|
| attractive | sucrose        | diet                            | 0.797            |
|            |                | concentration                   | <b>&lt;0.001</b> |
|            |                | diet X concentration            | 0.134            |
|            |                | genotype                        | 0.743            |
|            |                | genotype X concentration        | 0.181            |
|            |                | diet X genotype                 | 0.889            |
|            |                | diet X genotype X concentration | <b>0.034</b>     |
|            | MPG+IMP        | diet                            | 0.918            |
|            |                | concentration                   | <b>&lt;0.001</b> |
|            |                | diet X concentration            | 0.119            |
|            |                | genotype                        | <b>0.001</b>     |
|            |                | genotype X concentration        | <b>0.005</b>     |
|            |                | diet X genotype                 | <b>0.031</b>     |
|            |                | diet X genotype X concentration | <b>0.026</b>     |
|            | NaCl           | diet                            | 0.360            |
|            |                | concentration                   | <b>0.030</b>     |
|            |                | diet X concentration            | <b>0.005</b>     |
|            |                | genotype                        | <b>&lt;0.001</b> |
|            |                | genotype X concentration        | 0.640            |
|            |                | diet X genotype                 | <b>0.001</b>     |
|            |                | diet X genotype X concentration | <b>0.004</b>     |
|            | NaCl+amiloride | diet                            | 0.075            |
|            |                | concentration                   | 0.067            |
|            |                | diet X concentration            | 0.871            |
|            |                | genotype                        | <b>0.001</b>     |
|            |                | genotype X concentration        | 0.522            |

| Protocol | Substance      | Factor                          | p-Value          |
|----------|----------------|---------------------------------|------------------|
|          | amiloride      | diet X genotype                 | <b>&lt;0.001</b> |
|          |                | diet X genotype X concentration | 0.974            |
|          |                | diet                            | 0.414            |
|          |                | genotype                        | <b>0.001</b>     |
|          |                | diet X genotype                 | <b>0.012</b>     |
|          | IMP            | diet                            | 0.380            |
|          |                | genotype                        | 0.457            |
|          |                | diet X genotype                 | 0.724            |
|          | denatonium     | diet                            | 0.293            |
|          |                | genotype                        | 0.663            |
|          |                | diet X genotype                 | 0.764            |
|          | citric aid     | diet                            | 0.113            |
|          |                | genotype                        | <b>0.006</b>     |
|          |                | diet X genotype                 | <b>0.009</b>     |
| aversive | denatonium     | diet                            | 0.089            |
|          |                | concentration                   | <b>&lt;0.001</b> |
|          |                | diet X concentration            | 0.757            |
|          |                | genotype                        | <b>&lt;0.001</b> |
|          |                | genotype X concentration        | <b>&lt;0.001</b> |
|          |                | diet X genotype                 | <b>&lt;0.001</b> |
|          |                | diet X genotype X concentration | <b>0.002</b>     |
|          | citric acid    | diet                            | <b>0.015</b>     |
|          |                | concentration                   | <b>&lt;0.001</b> |
|          |                | diet X concentration            | 0.497            |
|          |                | genotype                        | <b>&lt;0.001</b> |
|          |                | genotype X concentration        | <b>&lt;0.001</b> |
|          |                | diet X genotype                 | <b>&lt;0.001</b> |
|          |                | diet X genotype X concentration | <b>&lt;0.001</b> |
|          | NaCl           | diet                            | <b>&lt;0.001</b> |
|          |                | concentration                   | <b>&lt;0.001</b> |
|          |                | diet X concentration            | <b>0.012</b>     |
|          |                | genotype                        | 0.060            |
|          |                | genotype X concentration        | <b>0.004</b>     |
|          |                | diet X genotype                 | <b>&lt;0.001</b> |
|          |                | diet X genotype X concentration | <b>&lt;0.001</b> |
|          | NaCl+amiloride | diet                            | <b>&lt;0.001</b> |
|          |                | concentration                   | <b>&lt;0.001</b> |

| Protocol | Substance | Factor                          | <i>p</i> -Value  |
|----------|-----------|---------------------------------|------------------|
|          |           | diet X concentration            | <b>&lt;0.001</b> |
|          |           | genotype                        | 0.758            |
|          |           | genotype X concentration        | 0.132            |
|          |           | diet X genotype                 | <b>0.002</b>     |
|          |           | diet X genotype X concentration | <b>&lt;0.001</b> |
|          | amiloride | diet                            | 0.389            |
|          |           | genotype                        | <b>0.002</b>     |
|          |           | diet X genotype                 | <b>0.028</b>     |
|          | sucrose   | diet                            | <b>0.009</b>     |
|          |           | genotype                        | 0.815            |
|          |           | diet X genotype                 | <b>0.007</b>     |
|          | sucralose | diet                            | 0.080            |
|          |           | genotype                        | 0.166            |
|          |           | diet X genotype                 | <b>0.025</b>     |
|          | MPG+IMP   | diet                            | <b>0.001</b>     |
|          |           | genotype                        | <b>0.004</b>     |
|          |           | diet X genotype                 | <b>&lt;0.001</b> |

**Table S4.** Statistical significance of different factors on the short-term preference tests of Scnn1<sup>+/+</sup> and Scnn1<sup>aa/bb</sup> animals after amiloride intervention for 36 h. After receiving sodium-adequate diet, animals either had access to water or amiloride-containing water (300 µM), following short-term preference testing in an automated gustometer. Data represent the statistical significance (*p*-value) of an intervention (water with or without amiloride), genotype (Scnn1<sup>+/+</sup> versus Scnn1<sup>aa/bb</sup>), and intervention X genotype on different taste solutions and their concentrations. Statistical testing was based on UNIANOVA and post-hoc analysis using Bonferroni's multiple comparison test for data points of 10 to 16 animals. Differences were considered to be statistically significant if *p* < 0.05, as indicated in bold.

| Substance      | Concentration | Intervention     | Genotype     | Intervention X genotype |
|----------------|---------------|------------------|--------------|-------------------------|
| sucrose        | 10            | <b>0.002</b>     | 0.160        | <b>0.001</b>            |
|                | 100           | <b>0.007</b>     | 0.427        | <b>0.002</b>            |
|                | 1000          | <b>&lt;0.001</b> | 0.776        | <b>&lt;0.001</b>        |
| MPG+IMP        | 1             | 0.633            | 0.531        | 0.198                   |
|                | 10            | <b>0.001</b>     | <b>0.003</b> | <b>&lt;0.001</b>        |
|                | 100           | <b>&lt;0.001</b> | <b>0.036</b> | <b>&lt;0.001</b>        |
| NaCl           | 10            | <b>0.008</b>     | 0.162        | <b>0.033</b>            |
|                | 100           | <b>&lt;0.001</b> | <b>0.001</b> | <b>&lt;0.001</b>        |
|                | 1000          | <b>&lt;0.001</b> | <b>0.011</b> | <b>&lt;0.001</b>        |
| NaCl+amiloride | 10            | <b>&lt;0.001</b> | <b>0.019</b> | <b>&lt;0.001</b>        |
|                | 100           | <b>&lt;0.001</b> | 0.525        | <b>&lt;0.001</b>        |
|                | 1000          | <b>0.002</b>     | <b>0.030</b> | <b>0.002</b>            |
| denatonium     | 10            | 0.583            | 0.599        | 0.684                   |
| citric aid     | 100           | <b>0.006</b>     | 0.488        | <b>0.026</b>            |

**Table S5.** Statistical significance of different factors on the short-term preference tests of Scnn1<sup>+/+/+</sup> and Scnn1<sup>aa/bb</sup> animals after access to amiloride-containing drinking water for 36 h. After receiving sodium-adequate diet, animals either had access to water or amiloride-containing water (300 µM), following short-term preference testing in an automated gustometer. Data represent the statistical significance (*p*-value) of intervention (water with or without amiloride), genotype, concentration, and different combination/interaction of them based on all 5 concentrations tested for 1 stimulus/substance (for denatonium and citric acid only 1 concentration was tested). Test was based on UNIANOVA and post-hoc analysis using Bonferroni's multiple comparison test relying on data of 10 to 16 animals. Differences were considered to be statistically significant if  $p < 0.05$ , as indicated in bold.

| Substance      | Factor                                  | <i>p</i> -Value |
|----------------|-----------------------------------------|-----------------|
| sucrose        | intervention                            | <0.001          |
|                | concentration                           | <0.001          |
|                | intervention X concentration            | <0.001          |
|                | genotype                                | 0.998           |
|                | genotype X concentration                | 0.564           |
|                | intervention X genotype                 | <0.001          |
|                | intervention X genotype X concentration | <0.001          |
| MPG+IMP        | intervention                            | <0.001          |
|                | concentration                           | <0.001          |
|                | intervention X concentration            | <0.001          |
|                | genotype                                | 0.001           |
|                | genotype X concentration                | 0.119           |
|                | intervention X genotype                 | <0.001          |
|                | intervention X genotype X concentration | 0.001           |
| NaCl           | intervention                            | <0.001          |
|                | concentration                           | <0.001          |
|                | intervention X concentration            | 0.003           |
|                | genotype                                | <0.001          |
|                | genotype X concentration                | 0.019           |
|                | intervention X genotype                 | <0.001          |
|                | intervention X genotype X concentration | 0.001           |
| NaCl+amiloride | intervention                            | <0.001          |
|                | concentration                           | <0.001          |
|                | intervention X concentration            | 0.002           |
|                | genotype                                | 0.007           |
|                | genotype X concentration                | 0.364           |
|                | intervention X genotype                 | <0.001          |
|                | intervention X genotype X concentration | 0.014           |
| denatonium     | intervention                            | 0.583           |
|                | genotype                                | 0.599           |
|                | intervention X genotype                 | 0.684           |
| citric aid     | intervention                            | 0.006           |
|                | genotype                                | 0.488           |
|                | intervention X genotype                 | 0.026           |
